# Supplementary material
Source: publisher site journal article supplement (https://jor.pensoft.net/article/28888/download/suppl/31/)
Supplement: Supplementary file 1

**S1 Table. Sample collection localities, locality coordinates, and number of each species sampled in each year (*N. robustus* / *N. bivocatus*).**

| Locality                                   | Coordinates | 2006    | 2013   | 2014    |
|--------------------------------------------|-------------|---------|--------|---------|
| Atlanta State Wildlife Area                | 39.9, -92.5 | -- / -- | 2 / 7  | -- / -- |
| Dunn Ranch Prairie                         | 40.5, -94.1 | -- / -- | 4 / 1  | -- / -- |
| Eagle Bluffs Conservation Area             | 38.9, -92.5 | 8 / --  | 8 / 2  | 17 / -- |
| Grassland Trailhead                        | 38.9, -92.3 | -- / -- | -- / 5 | -- / -- |
| Oberle Prairie                             | 40.1, -92.8 | -- / -- | -- / 4 | -- / -- |
| Star School Hill Prairie Conservation Area | 40.6, -95.6 | -- / -- | 5 / -- | -- / -- |
| Three Creeks Conservation Area             | 38.8, -92.3 | 2 / 7   | 5 / 4  | 3 / --  |
| Tucker Prairie Natural Area                | 38.9, -91.0 | 1 / --  | 2 / -- | -- / -- |

Species assignments were determined based on call phenotypes as show in Figure 1 and described in the methods. The six individuals possessing intermediate phenotypes are not included.
